# Supplementary material for: The increasing threat to stratospheric ozone from dichloromethane
Source: PubMed Central journal article supplement (PMC5490265; doi:10.1038/ncomms15962), 2017-06-27
Supplement: ncomms15962-s1.pdf [file ncomms15962-s1.pdf]

Type of file: PDF

Size of file: 0 KB

Title of file for HTML: Supplementary Information

Description: Supplementary Figures and Supplementary Tables

Type of file: pdf

Size of file: 0 KB

Title of file for HTML: Peer Review File

Description:

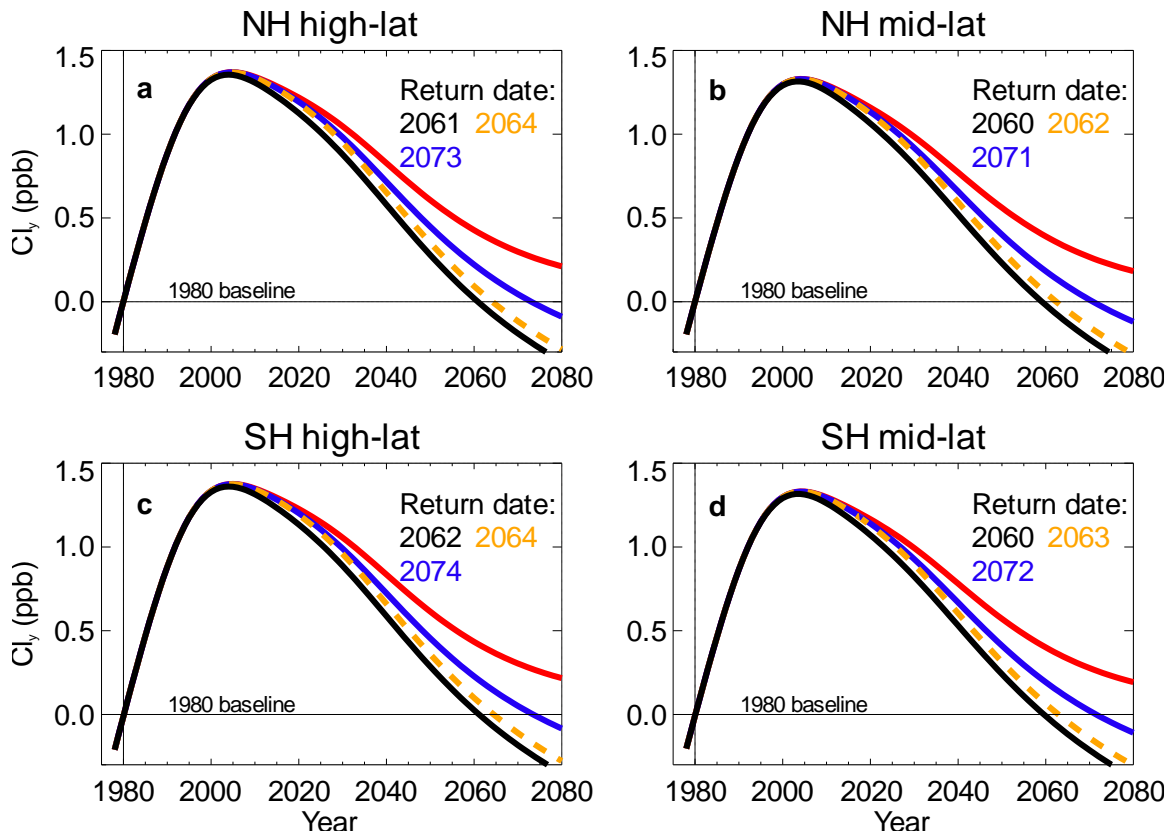

**Supplementary Figure 1.** Modelled inorganic chlorine ( $Cl_y$ ) changes in the upper stratosphere.  $Cl_y$  changes are expressed in parts per billion (ppb) relative to 1980 baseline at 5 hPa for simulations without  $CH_2Cl_2$  (black) and for  $CH_2Cl_2$  growth Scenario 1 (blue) and Scenario 2 (red). **(a)**  $Cl_y$  changes in northern high latitudes ( $60^\circ N$ - $90^\circ N$ ). **(b)**  $Cl_y$  change in northern mid-latitudes ( $35^\circ N$ - $60^\circ N$ ). **(c)**  $Cl_y$  changes in southern high latitudes ( $60^\circ S$ - $90^\circ S$ ). **(d)**  $Cl_y$  change in southern mid-latitudes ( $35^\circ S$ - $60^\circ S$ ). Annotated are the projected dates when  $Cl_y$  returns to 1980 levels.

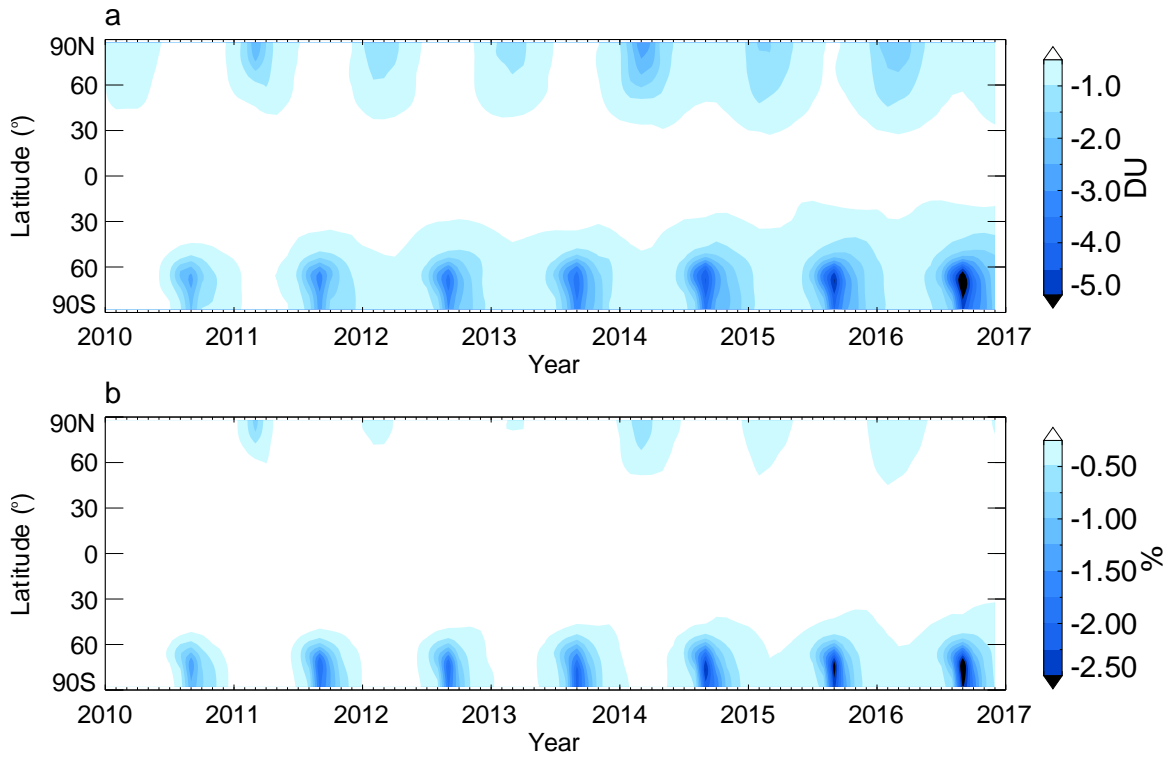

**Supplementary Figure 2.** Monthly stratospheric column ozone decreases due to CH<sub>2</sub>Cl<sub>2</sub> in the recent past and present. **(a)** Difference in zonal mean monthly mean column ozone (Dobson units, DU) between run Scenario 1 and run no\_CH<sub>2</sub>Cl<sub>2</sub>. **(b)** As **a** but expressed as percentage (%) change.

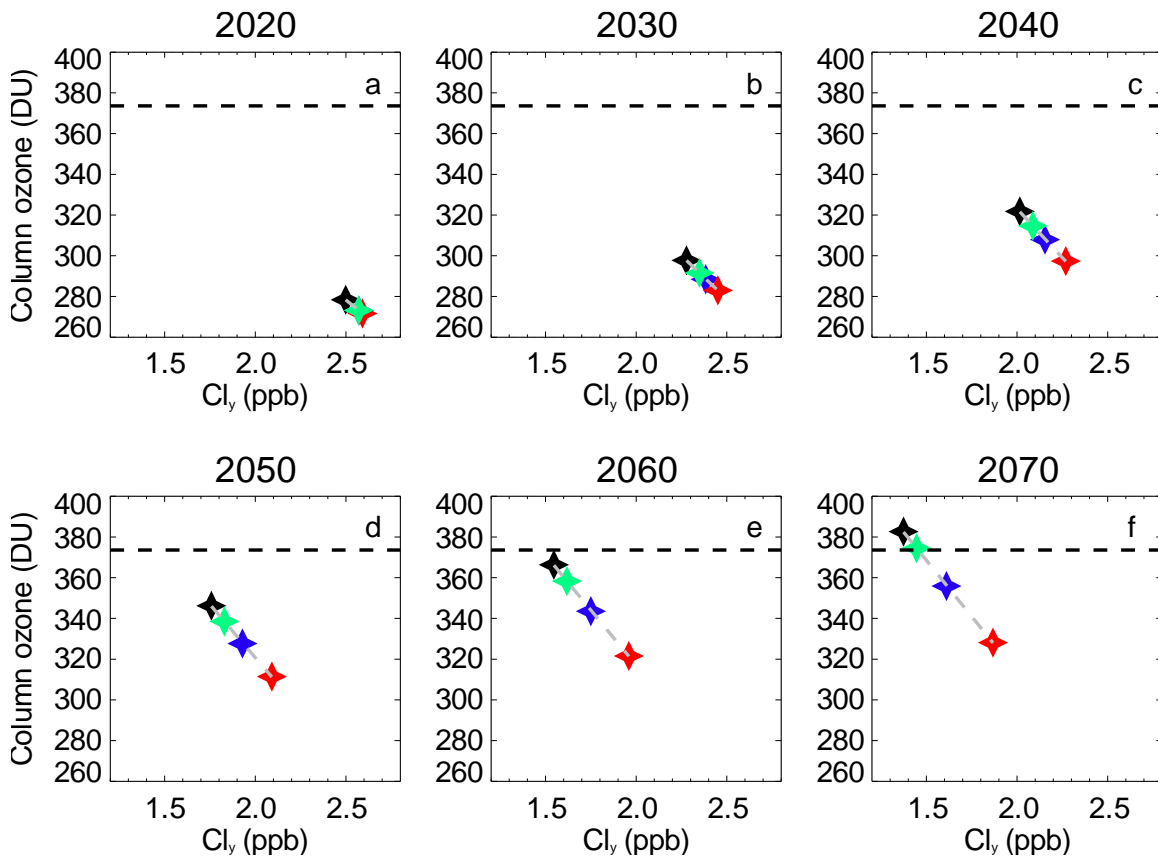

**Supplementary Figure 3.** Relationship between Antarctic stratospheric column ozone and inorganic chlorine ( $Cl_y$ ). **(a-f)** Modelled October mean ozone column (Dobson units, DU) versus mean  $Cl_y$  (parts per billion, ppb) at 50 hPa (lower stratosphere) over Antarctica ( $60^{\circ}S-90^{\circ}S$ ). The relationship is shown for model simulations without  $CH_2Cl_2$  (black star) and for  $CH_2Cl_2$  growth Scenarios 1 (blue star) and 2 (red star). The grey dashed line is a linear fit to these data. The green star represents a constant offset to the no  $CH_2Cl_2$  case, based on 2016 stratospheric loading of  $CH_2Cl_2$  (i.e. the ozone- $Cl_y$  relationship with no future growth in  $CH_2Cl_2$ ). The baseline column ozone amount in 1980 is shown by the horizontal dashed line.

**Supplementary Table 1.** Annual mean mixing ratio (ppt) of CH<sub>2</sub>Cl<sub>2</sub> entering the stratosphere under Scenario 1.

| Year | CH <sub>2</sub> Cl <sub>2</sub> | Year | CH <sub>2</sub> Cl <sub>2</sub> | Year | CH <sub>2</sub> Cl <sub>2</sub> | Year | CH <sub>2</sub> Cl <sub>2</sub> | Year | CH <sub>2</sub> Cl <sub>2</sub> | Year | CH <sub>2</sub> Cl <sub>2</sub> |
|------|---------------------------------|------|---------------------------------|------|---------------------------------|------|---------------------------------|------|---------------------------------|------|---------------------------------|
| 2005 | 18.0                            | 2021 | 44.6                            | 2037 | 70.7                            | 2053 | 96.8                            | 2069 | 122.9                           | 2085 | 149.0                           |
| 2006 | 18.6                            | 2022 | 46.2                            | 2038 | 72.3                            | 2054 | 98.4                            | 2070 | 124.5                           | 2086 | 150.6                           |
| 2007 | 20.9                            | 2023 | 47.9                            | 2039 | 74.0                            | 2055 | 100.1                           | 2071 | 126.2                           | 2087 | 152.2                           |
| 2008 | 21.9                            | 2024 | 49.5                            | 2040 | 75.6                            | 2056 | 101.7                           | 2072 | 127.8                           | 2088 | 153.9                           |
| 2009 | 22.5                            | 2025 | 51.1                            | 2041 | 77.2                            | 2057 | 103.3                           | 2073 | 129.4                           | 2089 | 155.5                           |
| 2010 | 25.7                            | 2026 | 52.8                            | 2042 | 78.9                            | 2058 | 104.9                           | 2074 | 131.0                           | 2090 | 157.1                           |
| 2011 | 26.0                            | 2027 | 54.4                            | 2043 | 80.5                            | 2059 | 106.6                           | 2075 | 132.7                           | 2091 | 158.8                           |
| 2012 | 27.6                            | 2028 | 56.0                            | 2044 | 82.1                            | 2060 | 108.2                           | 2076 | 134.3                           | 2092 | 160.4                           |
| 2013 | 33.2                            | 2029 | 57.7                            | 2045 | 83.7                            | 2061 | 109.8                           | 2077 | 135.9                           | 2093 | 162.0                           |
| 2014 | 35.9                            | 2030 | 59.3                            | 2046 | 85.4                            | 2062 | 111.5                           | 2078 | 137.6                           | 2094 | 163.7                           |
| 2015 | 34.8                            | 2031 | 60.9                            | 2047 | 87.0                            | 2063 | 113.1                           | 2079 | 139.2                           | 2095 | 165.3                           |
| 2016 | 36.4                            | 2032 | 62.5                            | 2048 | 88.6                            | 2064 | 114.7                           | 2080 | 140.8                           | 2096 | 166.9                           |
| 2017 | 38.1                            | 2033 | 64.2                            | 2049 | 90.3                            | 2065 | 116.4                           | 2081 | 142.5                           | 2097 | 168.6                           |
| 2018 | 39.7                            | 2034 | 65.8                            | 2050 | 91.9                            | 2066 | 118.0                           | 2082 | 144.1                           | 2098 | 170.2                           |
| 2019 | 41.3                            | 2035 | 67.4                            | 2051 | 93.5                            | 2067 | 119.6                           | 2083 | 145.7                           | 2099 | 171.8                           |
| 2020 | 43.0                            | 2036 | 69.1                            | 2052 | 95.2                            | 2068 | 121.3                           | 2084 | 147.4                           | 2100 | 173.4                           |

**Supplementary Table 2.** As Supplementary Table 1 but for Scenario 2.

| Year | CH <sub>2</sub> Cl <sub>2</sub> | Year | CH <sub>2</sub> Cl <sub>2</sub> | Year | CH <sub>2</sub> Cl <sub>2</sub> | Year | CH <sub>2</sub> Cl <sub>2</sub> | Year | CH <sub>2</sub> Cl <sub>2</sub> | Year | CH <sub>2</sub> Cl <sub>2</sub> |
|------|---------------------------------|------|---------------------------------|------|---------------------------------|------|---------------------------------|------|---------------------------------|------|---------------------------------|
| 2005 | 18.0                            | 2021 | 66.2                            | 2037 | 130.1                           | 2053 | 194.0                           | 2069 | 257.9                           | 2085 | 321.8                           |
| 2006 | 18.6                            | 2022 | 70.2                            | 2038 | 134.1                           | 2054 | 198.0                           | 2070 | 261.9                           | 2086 | 325.8                           |
| 2007 | 20.9                            | 2023 | 74.2                            | 2039 | 138.1                           | 2055 | 202.0                           | 2071 | 265.9                           | 2087 | 329.8                           |
| 2008 | 21.9                            | 2024 | 78.2                            | 2040 | 142.1                           | 2056 | 206.0                           | 2072 | 269.9                           | 2088 | 333.8                           |
| 2009 | 22.5                            | 2025 | 82.2                            | 2041 | 146.1                           | 2057 | 210.0                           | 2073 | 273.9                           | 2089 | 337.8                           |
| 2010 | 25.7                            | 2026 | 86.2                            | 2042 | 150.1                           | 2058 | 214.0                           | 2074 | 277.9                           | 2090 | 341.8                           |
| 2011 | 26.0                            | 2027 | 90.2                            | 2043 | 154.1                           | 2059 | 218.0                           | 2075 | 281.9                           | 2091 | 345.8                           |
| 2012 | 27.6                            | 2028 | 94.2                            | 2044 | 158.1                           | 2060 | 222.0                           | 2076 | 285.9                           | 2092 | 349.8                           |
| 2013 | 33.2                            | 2029 | 98.2                            | 2045 | 162.1                           | 2061 | 226.0                           | 2077 | 289.9                           | 2093 | 353.8                           |
| 2014 | 35.9                            | 2030 | 102.2                           | 2046 | 166.1                           | 2062 | 230.0                           | 2078 | 293.9                           | 2094 | 357.8                           |
| 2015 | 42.2                            | 2031 | 106.1                           | 2047 | 170.1                           | 2063 | 234.0                           | 2079 | 297.9                           | 2095 | 361.8                           |
| 2016 | 46.2                            | 2032 | 110.1                           | 2048 | 174.0                           | 2064 | 238.0                           | 2080 | 301.9                           | 2096 | 365.8                           |
| 2017 | 50.2                            | 2033 | 114.1                           | 2049 | 178.0                           | 2065 | 242.0                           | 2081 | 305.8                           | 2097 | 369.8                           |
| 2018 | 54.2                            | 2034 | 118.1                           | 2050 | 182.0                           | 2066 | 246.0                           | 2082 | 309.8                           | 2098 | 373.7                           |
| 2019 | 58.2                            | 2035 | 122.1                           | 2051 | 186.0                           | 2067 | 250.0                           | 2083 | 313.8                           | 2099 | 377.7                           |
| 2020 | 62.2                            | 2036 | 126.1                           | 2052 | 190.0                           | 2068 | 254.0                           | 2084 | 317.8                           | 2100 | 381.7                           |
